# Supplementary material for: Recent Development of Carbon-Nanotube-Based Solar Heat Absorption Devices and Their Application
Source: MDPI journal article supplement (doi:10.3390/nano12213871), 2022-11-02
Supplement: s1 [file s1]

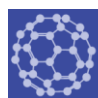

# Recent development of Carbon nanotubes based solar heat absorption- devices and their application

Saiful Islam<sup>1,2\*</sup> and Hiroshi Furuta<sup>1,2\*</sup>

<sup>1</sup> School of Systems Engineering, Kochi University of Technology, Kochi 782-8502, Japan

<sup>2</sup> Center for Nanotechnology, Research Institute, Kochi University of Technology, Kochi 782-8502, Japan

\* Correspondence: 256003q@gs.kochi-tech.ac.jp (S.I.); furuta.hiroshi@kochi-tech.ac.jp (H.F.);

Tel.: +81-887-57-2211

**Table S1.** Summary of the key parameters for the CNT based SWP under weak solar irradiation

| Title                                                                                                                                                   | Year               | Materials used                                                         | Solar intensity (kWm <sup>-2</sup> ) | Evaporation rate (kg m <sup>-2</sup> h <sup>-1</sup> ) | Evaporation efficiency | Ref. |
|---------------------------------------------------------------------------------------------------------------------------------------------------------|--------------------|------------------------------------------------------------------------|--------------------------------------|--------------------------------------------------------|------------------------|------|
| Superwetting Monolithic Hollow-Carbon-Nanotubes Aerogels with Hierarchically Nanoporous Structure for Efficient Solar Steam Generation                  | Mu et al. (2018)   | CMP based carbon aerogel                                               | 1                                    | 1.446                                                  | 86.8%                  | 51   |
| Enhanced solar steam generation using carbon nanotube membrane distillation device with heat localization                                               | Miao et al. (2018) | CNT membrane,                                                          | 1                                    | 1.31                                                   | 84.6%                  | 45   |
| Flexible and Washable CNT-Embedded PAN Nonwoven Fabrics for Solar-Enabled Evaporation and Desalination of Seawater.                                     | Zhu et al. (2019)  | polyacrylonitrile (PAN) and CNTs                                       | 1                                    | 1.44                                                   | 81%                    | 42   |
| Self-floating aerogel composed of carbon nanotubes and ultralong hydroxyapatite nanowires for highly efficient solar energy-assisted water purification | Qin et al. (2019)  | Hydroxyapatite (HAP) nanowire aerogel and CNTs                         | 1                                    | 1.34                                                   | 89.4%                  | 37   |
| Energy Matching for Boosting Water Evaporation in Direct Solar Steam Generation                                                                         | Mu et al. (2020)   | bilayer-structures of carbon nanotubes aerogel (CA)-coated wood (CACW) | 1                                    | 2.22                                                   | 93.2%                  | 40   |
| Highly Efficient Solar Steam Generation under Low Solar Flux via Carbon-Nanotube-Modified Sugarcane                                                     | Yang et al. (2021) | CNT-sugarcane bilayer structure                                        | 1                                    | 1.63                                                   | 94.2%                  | 56   |
| One-step fabrication of a stretchable and anti-oil-                                                                                                     | He et al. (2021)   | Polydopamine-encapsulated                                              | 1                                    | 1.44                                                   | 90.1%                  | 41   |

|                                                                                                                                                                 |                    |                                                                                                           |   |      |        |    |
|-----------------------------------------------------------------------------------------------------------------------------------------------------------------|--------------------|-----------------------------------------------------------------------------------------------------------|---|------|--------|----|
| fouling nanofiber membrane for solar steam generation                                                                                                           |                    | carbon nano-tube/polyurethane (PDA@CNT/PU) nanofiber membrane                                             |   |      |        |    |
| Gradient Heating Effect Modulated by Hydrophobic/Hydrophilic Carbon Nanotube Network Structures for Ultrafast Solar Steam Generation                            | Cao et al. (2021)  | Hydrophobic CNT film (Heating layer) and hydrophilic polyvinyl alcohol (PVA)/CNT foam (evaporating layer) | 1 | 4.2  | —      | 57 |
| Simple and robust MXene/carbon nanotubes/cotton fabrics for textile wastewater purification via solar-driven interfacial water evaporation                      | Wang et al. (2021) | MXene/CNTs/cotton fabrics                                                                                 | 1 | 1.35 | 88.2%  | 58 |
| Synergy of photothermal effect in integrated 0D TiO <sub>2</sub> nanoparticles/1D carboxylated carbon nanotubes for multifunctional water purification          | Li et al. (2022)   | PDA@TiO <sub>2</sub> NPs and CNTs                                                                         | 1 | 1.81 | 92.4%  | 52 |
| Carbon-supported tungsten bronze aerogels with synergistically enhanced photothermal conversion performance: Fabrication and application in solar evaporation   | Li et al. (2022)   | rGC-CWO/corn straw                                                                                        | 1 | 1.93 | 85.9%  | 54 |
| High-Performance Freshwater Harvesting System by Coupling Solar Desalination and Fog Collection with Hierarchical Porous Microneedle Arrays                     | Zhou et al. (2022) | polyethylene glycol diacrylate (PEGDA)/ Sodium alginate (SA)/CNT (MNPSC)                                  | 1 | 2.46 | 91.14% | 50 |
| Asymmetric Cellulose/Carbon Nanotubes Membrane with Interconnected Pores Fabricated by Droplet Method for Solar-Driven Interfacial Evaporation and Desalination | Yang et al. (2022) | Asymmetric Cellulose/CNTs membrane                                                                        | 1 | 1.6  | 89%    | 55 |

**Table S2.** Key parameters of three-dimensional structured CNT based solar absorbers

| Title                                                                                                           | Year               | Materials used                                             | Solar intensity (kWm <sup>-2</sup> ) | Evaporation rate (kg m <sup>-2</sup> h <sup>-1</sup> ) | Evaporation efficiency | Ref. |
|-----------------------------------------------------------------------------------------------------------------|--------------------|------------------------------------------------------------|--------------------------------------|--------------------------------------------------------|------------------------|------|
| Nature-Inspired, 3D Origami Solar Steam Generator toward Near Full Utilization of Solar Energy                  | Hong et al. (2018) | Graphene oxide/CNT composite                               | 1                                    | 1.59                                                   | >85%                   | 59   |
| Highly efficient three-dimensional solar evaporator for high salinity desalination by localized crystallization | Wu et al. (2020)   | Nano composite of CNTs and citrate sodium                  | 1                                    | 2.63                                                   | >96%                   | 60   |
| Hierarchically Designed Three-Dimensional Composite Structure on a Cellulose-Based Solar Steam Generator        | Jin et al. (2022)  | Bacterial Cellulose (BC)/ reduced Graphene oxide(RGO)/CNTs | 1                                    | 1.85                                                   | 90.2%                  | 61   |

**Table S3.** Key parameters of CNT based solar absorbers for water purification under strong solar intensity

| Name                                                                                                                                                                       | Year               | Materials used                                                                                     | Solar Intensity (kWm <sup>-2</sup> ) | Evaporation rate (kg m <sup>-2</sup> h <sup>-1</sup> ) | Evaporation efficiency | Ref. |
|----------------------------------------------------------------------------------------------------------------------------------------------------------------------------|--------------------|----------------------------------------------------------------------------------------------------|--------------------------------------|--------------------------------------------------------|------------------------|------|
| Lightweight, Mesoporous, and Highly Absorptive All-Nanofiber Aerogel for Efficient Solar Steam Generation                                                                  | Jiag et al. (2017) | Cellulose nanofibril (CNF)-CNT bilayer aerogel                                                     | 1                                    | 1.11                                                   | 76.3%                  | 44   |
|                                                                                                                                                                            |                    |                                                                                                    | 3                                    | 3.52                                                   | 81.4%                  |      |
| Simple, Low-Dose, Durable, and Carbon-Nanotube-Based Floating Solar Still for Efficient Desalination and Purification                                                      | Gan et al. (2019)  | 1) MWCNTs 2) Air-laid paper with BET surface area 3) Polyurethane sponge (PUS) Name: ALP-CNTs -5mg | 2                                    | 1.58                                                   | —                      | 62   |
| Flame Synthesis of Superhydrophilic Carbon Nanotubes/Ni Foam Decorated with Fe <sub>2</sub> O <sub>3</sub> Nanoparticles for Water Purification via Solar Steam Generation | Han et al. (2020)  | Fe <sub>2</sub> O <sub>3</sub> /CNT/Ni Foam nanocomposite                                          | 2                                    | 3                                                      | 91.3%                  | 43   |
|                                                                                                                                                                            |                    |                                                                                                    | 3                                    | 4.27                                                   | 93.8%                  |      |
| Coating of Wood with Fe <sub>2</sub> O <sub>3</sub> -Decorated Carbon Nanotubes by One Step Combustion for Efficient Solar Steam Generation                                | Li et al. (2021)   | Beech wood, Ferric acetylacetonate, CNT                                                            | 10                                   | 14.01                                                  | —                      | 67   |

|                                                                                                                                            |                     |                                                                                         |    |       |        |    |
|--------------------------------------------------------------------------------------------------------------------------------------------|---------------------|-----------------------------------------------------------------------------------------|----|-------|--------|----|
| An Ultrathin Flexible 2D Membrane Based on Single-Walled Nanotube–MoS <sub>2</sub> Hybrid Film for High Performance Solar Steam Generation | Yang et al. (2017)  | SWNT-MoS <sub>2</sub> film                                                              | 5  | 6.6   | 91.5%  | 64 |
| Highly Flexible and Efficient Solar Steam Generation Device                                                                                | Chen et al. 2017    | CNT coated Balsa wood                                                                   | 10 | 11.22 | 81%    | 66 |
| Extremely Black Vertically Aligned Carbon Nanotube Arrays for Solar Steam Generation                                                       | Yin et al. 2017     | VACNTs array                                                                            | 15 | 10    | 90%    | 49 |
| Enhanced direct steam generation via a bio-inspired solar heating method using carbon nanotube films                                       | Wang et al. (2017)  | CNT films                                                                               | 5  | 3.615 | 40%    | 47 |
| Recyclable Fe <sub>3</sub> O <sub>4</sub> @CNT nanoparticles for high-efficiency solar vapor Generation                                    | Shi et al. (2017)   | CNTs with magnetic Fe <sub>3</sub> O <sub>4</sub> (Fe <sub>3</sub> O <sub>4</sub> @CNT) | 1  | —     | 43.8%  | 65 |
|                                                                                                                                            |                     |                                                                                         | 3  | —     | 23.3%  |    |
|                                                                                                                                            |                     |                                                                                         | 10 | —     | 60.32% |    |
| All Natural, High Efficient Groundwater Extraction via Solar Steam/Vapor Generation                                                        | Wang et al. (2018)  | CNTs                                                                                    | 10 | 12    | 86%    | 48 |
| Multiscale Preparation of Graphene Oxide/Carbon Nanotube-Based Membrane Evaporators by a Spray Method for Efficient Solar Steam Generation | Zhang et al. (2022) | Graphene oxide (GO)/CNT                                                                 | 5  | 4.3   | 70.5%  | 46 |

**Table S4.** Key parameters of CNT based Solar thermoelectric generators

| Title                                                                                                          | Year                 | Materials Used                                                                        | Solar intensity                              | Temp. difference | Voltage | Power  | Ref. |
|----------------------------------------------------------------------------------------------------------------|----------------------|---------------------------------------------------------------------------------------|----------------------------------------------|------------------|---------|--------|------|
| A demo solar thermoelectric conversion device based on Bi <sub>2</sub> Te <sub>3</sub> and carbon nanotubes    | Xia et al. (2015)    | Bi <sub>2</sub> Te <sub>3</sub> module and CNTs used as a cover                       | 110 mWcm <sup>-2</sup>                       | —                | 400 mV  | —      | 81   |
| Combined solar concentration and carbon nanotube absorber for high performance solar thermoelectric generators | Li et al. (2018)     | customized Be <sub>2</sub> Te <sub>3</sub> modules and CNTs absorber used in hot side | 6 kWm <sup>-2</sup> to 200 kWm <sup>-2</sup> | 170 °C           | 11.6 V  | 11.2 W | 78   |
| Solar Harvesting: a Unique Opportunity for Organic Thermoelectrics?                                            | Jurado et al. (2019) | CoMoCat CNTs eDIPS CNT composite                                                      | 2 kWm <sup>-2</sup>                          | 30K              | —       | 180 nW | 76   |

|                                                                                                                                              |                     |                                                                  |                        |         |                 |           |    |
|----------------------------------------------------------------------------------------------------------------------------------------------|---------------------|------------------------------------------------------------------|------------------------|---------|-----------------|-----------|----|
| Heat source free water floating carbon nanotube thermoelectric generator                                                                     | Chiba et al. (2021) | SWCNTs                                                           | 1 kWm <sup>-2</sup>    | 80 °C   | 1300 µV         | 22.8 nW   | 75 |
| Intelligent light-driven flexible solar thermoelectric system                                                                                | Zhang et al. (2021) | SWCNT,polyvinyl-ide fluoride (PVDF) thermoelectric module        | 100 mWcm <sup>-2</sup> | 50K     | 6.4 mV          | 65.7 nW   | 82 |
| Enhanced thermoelectric performance and tunable polarity in 2D Cu <sub>2</sub> S-phenol superlattices composites for solar energy conversion | Li et al. (2021)    | p-type CPSL/CNT30 and n-type CP-SL/PEI-CNT30<br>4 pair TE module | 5 kWm <sup>-2</sup>    | —       | 6.86 mV         | 534.7 nW  | 71 |
| Novel Wearable Pyrothermoelectric Hybrid Generator for Solar Energy Harvesting                                                               | Zhang et al. (2022) | CNT/CT solar absorber                                            | 1.5 kWm <sup>-2</sup>  | —       | 3.7V            | —         | 80 |
| All-in-one single-piece flexible solar thermoelectric generator with scissored heat rectifying p-n modules                                   | Li et al. (2022)    | MWCNTs                                                           | 4 kWm <sup>-2</sup>    | 70.9 °C | 3.57 mV per leg | 1709.2 nW | 77 |

**Table S5.** Key parameters of CNT based Solar hybrid generators

| Title                                                                                                                                                                                   | Year               | Materials Used                                                                                                                     | Solar intensity                                             | Voltage                              | Power density | Power   | Ref. |
|-----------------------------------------------------------------------------------------------------------------------------------------------------------------------------------------|--------------------|------------------------------------------------------------------------------------------------------------------------------------|-------------------------------------------------------------|--------------------------------------|---------------|---------|------|
| Solar-driven simultaneous steam production and electricity generation from salinity                                                                                                     | Yang et al. (2017) | CNT modified filter paper as light absorber Nafion membrane used as the ion selective membrane and Ag/AgCl as the electrode system | Natural solar power (avg solar flux 0.7 kWm <sup>-2</sup> ) | 66 mV                                | —             | 3 mW    | 86   |
| Exploring Interface Confined Water Flow and Evaporation Enables Solar-Thermal Electro Integration Towards Clean Water and Electricity Harvest via Asymmetric Functionalization Strategy | Xiao et al. (2019) | CNTs film on modified PDMS filter paper                                                                                            | 1 kWm <sup>-2</sup>                                         | 0.55 V under 1 G ohm load resistance | —             | 2.1 µW  | 85   |
| Shape Conformal and Thermal Insulative Organic Solar                                                                                                                                    | Zhu et al. (2019)  | Bucky sponge (CNT/cellulose nanocrystals composite on                                                                              | 5 kWm <sup>-2</sup>                                         | —                                    | —             | 5.38 mW | 73   |

|                                                                                                                   |                    |                                                                                                |                     |   |                        |         |    |
|-------------------------------------------------------------------------------------------------------------------|--------------------|------------------------------------------------------------------------------------------------|---------------------|---|------------------------|---------|----|
| Absorber Sponge for Photothermal Water Evaporation and Thermoelectric Power Generation                            |                    | a polydimethylsiloxane (PDMS) sponge)<br>Covered the conventional TE module by<br>bucky sponge |                     |   |                        |         |    |
| Carbon Nanotube Network-Based Solar-Thermal Water Evaporator and Thermoelectric Module for Electricity Generation | Cao et al. (2021)  | CNT film covers the TE module                                                                  | 1 kWm <sup>-2</sup> | — | 1.1 Wm <sup>-2</sup>   | 0.38 mW | 72 |
| CNTs/Wood Composite Nanogenerator for Producing Both Steam and Electricity                                        | Ding et al. (2021) | MWCNTs modified woodblock                                                                      | 1 kWm <sup>-2</sup> | — | 0.35 mWm <sup>-2</sup> | —       | 84 |

**Table S6.** Key parameters of CNT based solar water heaters

| Title                                                                                                                                   | Year                          | Materials Used                                                                                | Solar collector type and size                                 | Solar intensity (Wm <sup>-2</sup> ) | Thermal efficiency                     | Ref. |
|-----------------------------------------------------------------------------------------------------------------------------------------|-------------------------------|-----------------------------------------------------------------------------------------------|---------------------------------------------------------------|-------------------------------------|----------------------------------------|------|
| Experimental evaluation of flat plate solar collector using nanofluids                                                                  | Verma et al. (2017)           | 0.2% MWCNT/base fluid water                                                                   | FPC                                                           | 1300                                | 23.47% enhancement compared with water | 107  |
| Evacuated tube solar collector with multifunctional absorber layers                                                                     | Sobhan-sarbandi et al. (2017) | ‘dry-drawable’ Carbon Nanotube (CNT) sheet coating<br>15 layer densified MWCNT + 14g paraffin | Evacuated tube Collector (ETC)<br>temp increased to 50 deg C. | 947                                 | —                                      | 115  |
| Performance evaluation of the senergy polycarbonate and asphalt carbon nanotube solar water heating collectors for building integration | Pugsley et al. (2017)         | Senergy polycarbonate CNT (PCNT) and asphalt CNT(ACNT)                                        | FPC and ETC                                                   | 800                                 | 62%                                    | 93   |
| Performance analysis of hybrid nanofluids in flat plate solar collector as an advanced working fluid                                    | Verma et al. (2018)           | 80% MgO and 20% MWCNTs hybrid nanofluid                                                       | FPC                                                           | 800                                 | 71.54%                                 | 94   |

|                                                                                                                                                                         |                        |                                                                                         |                                              |                 |        |     |
|-------------------------------------------------------------------------------------------------------------------------------------------------------------------------|------------------------|-----------------------------------------------------------------------------------------|----------------------------------------------|-----------------|--------|-----|
|                                                                                                                                                                         |                        | and base fluid water                                                                    |                                              |                 |        |     |
| Carbon nanotube nanofluid in enhancing the efficiency of evacuated tube solar collector                                                                                 | Mahbul et al. (2018)   | 0.2% SWCNT nanoparticle with base fluid water.                                          | ETC                                          | 900             | 66.7%  | 105 |
| Performance assessment of linear Fresnel solar reflector using MWCNTs_DW nanofluids                                                                                     | Ghodbane et al. (2019) | 0.3% MWCNTs nanofluid mixed with distilled water                                        | Linear Fresnel solar reflector               | 750             | 33.8%  | 103 |
| Thermal-hydraulic and thermodynamic performances of liquid metal based nanofluid in parabolic trough solar receiver tube                                                | Peng et al. (2019)     | Ga-CNT nanofluids                                                                       | Parabolic trough collector (PTCs)            | 1000            | 45.2%  | 102 |
| Energy and exergy analysis of a thermosiphon and forced-circulation flat-plate solar collector using MWCNT/water nanofluid                                              | Eltaweel et al. (2019) | Thermosiphon Nanofluid MWCNT/water                                                      | FPC size reduced 34% by using 0.1 wt% MWCNTs | From 520 to 914 | —      | 106 |
|                                                                                                                                                                         |                        | 0.01wt%                                                                                 |                                              |                 | 51.29% |     |
|                                                                                                                                                                         |                        | 0.05 wt%                                                                                |                                              |                 | 56.41% |     |
|                                                                                                                                                                         |                        | 0.1 wt%                                                                                 |                                              |                 | 70.67% |     |
| Comparative investigation of efficiency sensitivity in a flat plate solar collector according to nanofluids                                                             | Tong et al. (2020)     | 0.005 vol% concentration 20 nm MWCNT                                                    | FPC                                          | 1500            | 87%    | 98  |
| The stability, optical properties and solar-thermal conversion performance of SiC-MWCNTs hybrid nanofluids for the direct absorption solar collector (DASC) application | Li et al. (2020)       | Ethylene glycol based SiC-MWCNTs nanofluid with concentration of 1 wt% hybrid nanofluid | Direct Absorption Solar Collector (DASC)     | —               | 97.3%  | 109 |
| An experimental and numerical investigation on a paraffin wax/graphene oxide/carbon nanotubes composite material for solar thermal storage applications                 | Chen et al. (2020)     | Paraffin wax/graphene aerogel composed of graphene oxide and CNT                        | FPC                                          | 1000            | 73%    | 96  |

|                                                                                                                                                                                                |                          |                                                                                |                                                             |      |        |     |
|------------------------------------------------------------------------------------------------------------------------------------------------------------------------------------------------|--------------------------|--------------------------------------------------------------------------------|-------------------------------------------------------------|------|--------|-----|
| Augmenting the potable water produced from single slope solar still using CNT-doped paraffin wax as energy storage: experimental approach                                                      | Chamkha et al. (2020)    | CNT-doped paraffin wax                                                         | Phase Change Material (PCM) material thermal energy storage | 1010 | 58.7%  | 116 |
| Thermal Efficiency, Heat Transfer, and Friction Factor Analyses of MWCNT + Fe <sub>3</sub> O <sub>4</sub> Water Hybrid Nanofluids in a Solar Flat Plate Collector under Thermosyphon Condition | Saleh et al. (2021)      | 0.3% volume concentration of MWCNTs+Fe <sub>3</sub> O <sub>4</sub> based fluid | FPC                                                         | 785  | 63.85% | 92  |
| A comparison between flat-plate and evacuated tube solar collectors in terms of energy and exergy analysis by using nanofluid                                                                  | Eltaweel et al. (2021)   | 0.05% MWCNTs/water fluid                                                       | ETC                                                         | —    | 55%    | 89  |
| Improving environmental performance of a direct absorption parabolic trough collector by using hybrid nanofluids                                                                               | Mashhadian et al. (2021) | Hybrid nanofluid 0.04 wt% AlO <sub>3</sub> /MWCNTs Base fluid water            | Direct absorption PTC                                       | 856  | 64.9%  | 112 |
| The performance response of a heat pipe evacuated tube solar collector using MgO/MWCNT hybrid nanofluid as a working fluid                                                                     | Henein et al. (2022)     | MgO/MWCNT And base fluid is water.                                             | ETC 15 tubes Mass flow rate 1-3L/min                        | —    | 55.84% | 111 |
